# Supplementary material for: Identification of efferocytosis-related subtypes in gliomas and elucidating their characteristics and clinical significance
Source: Front Cell Dev Biol. 2023 Dec 13;11:1295891. doi: 10.3389/fcell.2023.1295891 (PMC10757721; doi:10.3389/fcell.2023.1295891)
Supplement: Supplementary file 1 [file Table1.xls]

## Sheet: Efferocytosis-related genes
Efferocytosis-related genes
CASP3
CX3CL1
CX3CR1
SPHK1
SPHK2
S1PR1
S1PR2
S1PR3
S1PR4
S1PR5
ADORA2A
ADORA2B
ABCA1
TLR9
CGAS
AIM2
ZBP1
HMGB1
S100A4
S100A9
S100B
TLR2
TLR4
ICAM3
CD14
GAS6
PROS1
MERTK
AXL
MFGE8
CCN1
ITGAV
ITGB3
ITGB5
ITGB8
ITGB1
THBS1
THBS2
THBS3
THBS4
CD36
CD24
SIGLEC10
CD47
HLA-A
HLA-B
HLA-C
LILRB1
SYK
PRKCE
LRP1
DOCK1
ELMO1
ELMO2
ELMO3
TRIO
WAS
ARPC1A
ARPC1B
ARPC2
ARPC3
ARPC4
ARPC5
WASF1
WASF2
WASF3
WASL
WHAMM
EEA1
MON1A
MON1B
RILP
LAMP1
LAMP2
STX7
VAMP7
RUBCN
BECN1
UVRAG
ATG13
ATG101
ATG7
ATG3
ATG5
ATG12
PLEKHM1
NR1H3
NR1H2
STING1
TREM2
P2RY2
P2RY6
P2RY1
P2RX1
P2RX3
ENTPD1
NT5E
AGER
IL1B
IL18
IL1R1
IL18R1
IL1A
IL33
IL36G
PANX1
HAVCR1
TIMD4
HAVCR2
BAIAP3
STAB1
STAB2
CD300A
CD300LB
CD300LF
TYRO3
SIRPA
PECAM1
PTPN6
PTPN11
RPS6KB2
GULP1
RAB5A
RAB5B
RAB5C
PIK3C3
PIK3R4
RAB7A
RAB7B
OSBPL1A
ATG14
ATG16L1
ATG16L2
PPARG
ICAM1
ITGB2
HLA-F
